# Supplementary material
Source: Research Square preprint supplement (doi:10.21203/rs.3.rs-9457638/v1)
Supplement: Supplementary file 1 [file 69fba67427d5c24c9b898a04.docx]

Supplementary Materials

Table. S1. Reliability test for aggregated emotion scales

| Factor | N of emotion Items | Cronbach's Alpha | Inter-item correlation |
| --- | --- | --- | --- |
| Emotional Distress | 20 | 0.93 | 0.76 |
| Emotional Comfort | 8 | 0.75 | 0.64 |
| Emotions Desire | 4 | 0.82 | 0.56 |

*Note:* N=4002

Table S2. Dunn's pairwise test of significant difference across dependent variables

|  | **Bin** | | Mean | Apathy | W/draw | Inert | Action |
| --- | --- | --- | --- | --- | --- | --- | --- |
| *Emotions Distress* | Denial | | 32.34 | *p=1.00* | *p<0.001* | *p<0.001* | *p<0.001* |
| Apathy | | 31.22 |  | *p<0.001* | *p<0.001* | *p<0.001* |
| W/draw | | 57.83 |  |  | *p<0.05* | *p<0.001* |
| Inert | | 52.02 |  |  |  | *p<0.001* |
| Action | | 61.86 |  |  |  |  |
| *Emotions Comfort* | Denial | | 18.05 | *p=1.00* | *p<0.001* | *p<0.001* | *p<0.001* |
| Apathy | | 15.76 |  | *p<0.001* | *p<0.001* | *p<0.001* |
| W/draw | | 11.17 |  |  | *p<0.05* | *p<0.05* |
| Inert | | 12.52 |  |  |  | *p=1.00* |
| Action | | 12.40 |  |  |  |  |
| *Emotions Desire* | Denial | | 5.62 | *p=1.00* | *p<0.001* | *p<0.001* | *p<0.001* |
| Apathy | | 5.67 |  | *p<0.001* | *p<0.001* | *p<0.001* |
| W/draw | | 6.87 |  |  | *p=1.00* | *p<0.001* |
| Inert | | 7.12 |  |  |  | *p<0.001* |
| Action | | 8.52 |  |  |  |  |
| *Self Efficacy* | Denial | | 7.56 | *p=1.00* | *p<0.001* | *p<0.001* | *p<0.001* |
| Apathy | | 7.35 |  | *p<0.001* | *p<0.001* | *p<0.001* |
| W/draw | | 6.09 |  |  | *p<0.05* | *p<0.001* |
| Inert | | 6.36 |  |  |  | *p<0.001* |
| Action | | 6.84 |  |  |  |  |
| *Collective Efficacy* | Denial | | 2.92 | *p=0.13* | *p<0.001* | *p<0.001* | *p<0.001* |
| Apathy | | 3.21 |  | *p=1.00* | *p<0.001* | *p<0.001* |
| W/draw | | 3.23 |  |  | *p<0.05* | *p<0.001* |
| Inert | | 3.92 |  |  |  | *p=0.63* |
| Action | | 4.00 |  |  |  |  |
|  |  | *Note: N=4004;* Bonferroni-adjusted significance | | | | | |

Table S3. Kruskal-Wallis non-parametric H-test across behavioral bin groupings

|  | Emotions Distress | Emotions Comfort | Emotions Desire | Self Efficacy | Collective Efficacy |
| --- | --- | --- | --- | --- | --- |
| Kruskal-Wallis H | 291.80 | 104.65 | 151.93 | 153.33 | 389.65 |
| df | 3.00 | 3.00 | 3.00 | 3.00 | 3.00 |
| Asymptotic p-value | 0.00 | 0.00 | 0.00 | 0.00 | 0.00 |

*Note:* N=4002
